# Supplementary material for: Efficient peroxymonosulfate activation by Fe–BiOCl hollow microspheres for carbamazepine removal
Source: Royal Society of Chemistry journal article supplement (doi:10.1039/d4lf00051j), 2024-01-01
Supplement: d4lf00051j1.pdf [file d4lf00051j1.pdf]

## Supporting Information

### Efficient peroxymonosulfate activation by Fe-BiOCl hollow microsphere for carbamazepine removal

Liyong Ding <sup>†a\*</sup>, Xuejuan Huang <sup>†b</sup>, Yuqin Liu <sup>b</sup>, Qingqing Jiang <sup>b</sup>, Juncheng Hu <sup>b\*</sup>

<sup>a</sup> College of Chemical and Material Engineering, Quzhou University, Quzhou 324000, China

<sup>b</sup> Hubei Key Laboratory of Catalysis and Materials Science, School of Chemistry and Materials Science, South-Central Minzu University, Wuhan 430074, China

<sup>†</sup> These authors contributed equally to this work.

\*Corresponding authors

E-mail: [liyongding1988@163.com](mailto:liyongding1988@163.com); [jchu@mail.scuec.edu.cn](mailto:jchu@mail.scuec.edu.cn)

## **1. Experimental Section**

### **1.1. Chemicals and materials**

All the materials were of analytical grade and used without further purification. Bismuth nitrate pentahydrate ( $\text{Bi}(\text{NO}_3)_3 \cdot 5\text{H}_2\text{O}$ ), ferric nitrate nonahydrate ( $\text{Fe}(\text{NO}_3)_3 \cdot 9\text{H}_2\text{O}$ ), potassium chloride (KCl), absolute ethanol, glycerol, methanol (MeOH), tert-butanol (TBA), p-benzoquinone (BQ) and ethylenediaminetetraacetate (EDTA-2Na) were purchased from Sinopharm Chemical Reagent Co. Ltd. (Shanghai, China). Carbamazepine (CBZ), Potassium monopersulfate triple salt (PMS,  $\text{KHSO}_5 \cdot 0.5\text{KHSO}_4 \cdot 0.5\text{K}_2\text{SO}_4$ ,  $\geq 42\%$   $\text{KHSO}_5$  basis) and L-histidine (HD) were purchased from Aladdin.

### **1.2. Synthesis of Fe-BiOCl and pure BiOCl hollow microsphere**

Firstly, 15 mL of glycerol and 50 mL of absolute ethanol were mixed and stirred to form a homogeneous solvent. Subsequently, 0.149 g of KCl (2 mmol) and 0.970 g of  $\text{Bi}(\text{NO}_3)_3 \cdot 5\text{H}_2\text{O}$  (2 mmol) was dissolved successively in the mixture solvent under constant stirring, then a certain amount of  $\text{Fe}(\text{NO}_3)_3 \cdot 9\text{H}_2\text{O}$  (molar ratio, Fe: Bi = 0.01, 0.02, 0.03, 0.05 and 0.07) was added and continue stirring for 30 min. After that, the suspension was transferred into a 100 mL Teflon-lined stainless autoclave and maintained at  $180^\circ\text{C}$  for 12 h. The precipitate was obtained by centrifugation, washed several times with deionized water and ethanol, the final yellow products were collected after drying at  $60^\circ\text{C}$  for 12 h and denoted as 1%, 2%, 3%, 5% and 7% Fe-BOC for further characterization, respectively.

The preparation method of BiOCl hollow microsphere (denoted as BOC) was the same as that of Fe-BiOCl except that  $\text{Fe}(\text{NO}_3)_3 \cdot 9\text{H}_2\text{O}$  is not added.

### **1.3. Photocatalytic measurement**

Photocatalytic performance was evaluated by the degradation of carbamazepine (CBZ) under simulated visible light irradiation. In a typical procedure, a certain amount of photocatalyst powder and PMS were added in 50 mL of CBZ solution (10 mg/L), the mixture was ultrasonicated for 10 min to form a homogeneous suspension. After that, the suspension was magnetically stirred in dark for 30 min to establish the adsorption-desorption equilibrium before illumination. The photocatalytic process was

carried out in Pyrex glass bottles with circulating water, and a 300 W Xe lamp with the UV cutoff filter ( $\lambda > 420$  nm) was used as the light source. About 3 mL of suspension was taken at certain intervals and filtered out by 0.22  $\mu\text{m}$  membrane filters. The concentrations of CBZ were detected by UV-vis spectrophotometer (Shimadzu, Japan) and the detection wavelength was at 284 nm.

#### 1.4. Characterization

The crystalline phases were characterized by powder X-ray diffraction (XRD) (Bruker D8 Advance, Cu  $K\alpha = 1.5404$  Å, Germany). The morphology images were studied by field emission scanning electron microscope (FE-SEM, SU8010, Hitachi, Japan). Transmission electron microscope (TEM), high-resolution transmission electron microscope (HRTEM) and energy-dispersive X-ray spectroscopy (EDX) were observed on Talos F200X (Thermo Fisher, USA). X-ray photoelectron spectroscopy (XPS) was carried out on a VG Multilab 2000 (VG Inc.), photoelectron spectrometer using Al  $K\alpha$  radiation as the excitation source. The UV-vis diffuse reflectance spectroscopy (DRS) was obtained from a Cary-5000 spectrophotometer (Agilent) with  $\text{BaSO}_4$  as reference substance. Photoluminescence (PL) measurements were carried out on an F-7000 (Hitachi) fluorescence spectrophotometer with a 150 W Xe lamp at 250 nm excitation wavelength.  $\text{N}_2$  adsorption/desorption was tested on an ASAP 2020 PLUS adsorption analyzer (Micromeritics, USA) to obtain the Brunauer-Emmett Teller (BET) surface area and the pore size distribution.

The photoelectrochemical tests were carried out on CHI-760E electrochemical workstation (Shenzhen LAMPLIC Science Co. Ltd. China) with a standard three-electrode system. The electrolyte was 0.5 M  $\text{Na}_2\text{SO}_4$  aqueous solution, Pt flake and an Hg/HgO electrode were used as the counter electrode and reference electrode, respectively. The catalyst solution (10 mg  $\text{BiOCl}$ , 500  $\mu\text{L}$  ethanol and 450  $\mu\text{L}$  ultrapure water, 50  $\mu\text{L}$  Nafion) was uniformly coated on the ITO glass (1 cm  $\times$  1 cm) to prepare working electrodes. The frequency range of electrochemical impedance spectroscopy (EIS) test was  $10^{-5}$ - $10^{-1}$  Hz and no voltage was applied between the electrodes. A 3 W LED lamp was used as the light source ( $\lambda \geq 420$  nm) to trigger the photocurrent response.



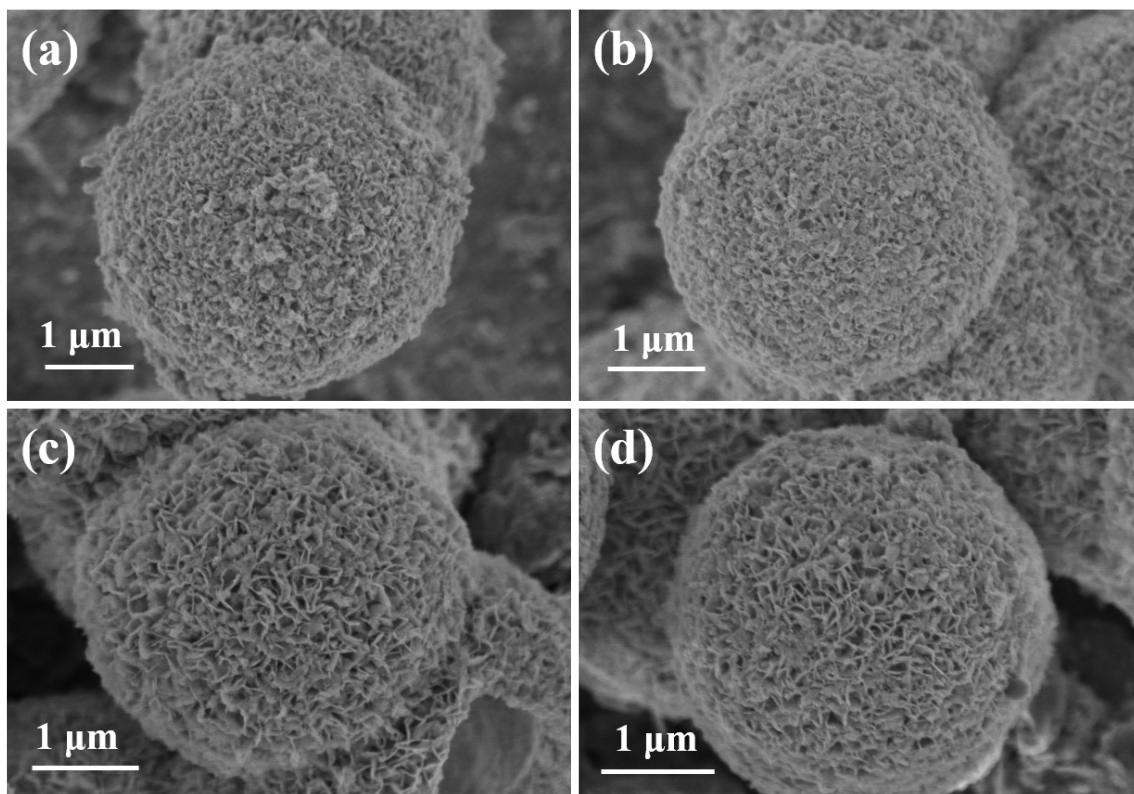

**Fig. S1.** SEM images of (a) 1% Fe-BOC, (b) 2% Fe-BOC, (c) 5% Fe-BOC and (d) 7% Fe-BOC samples.

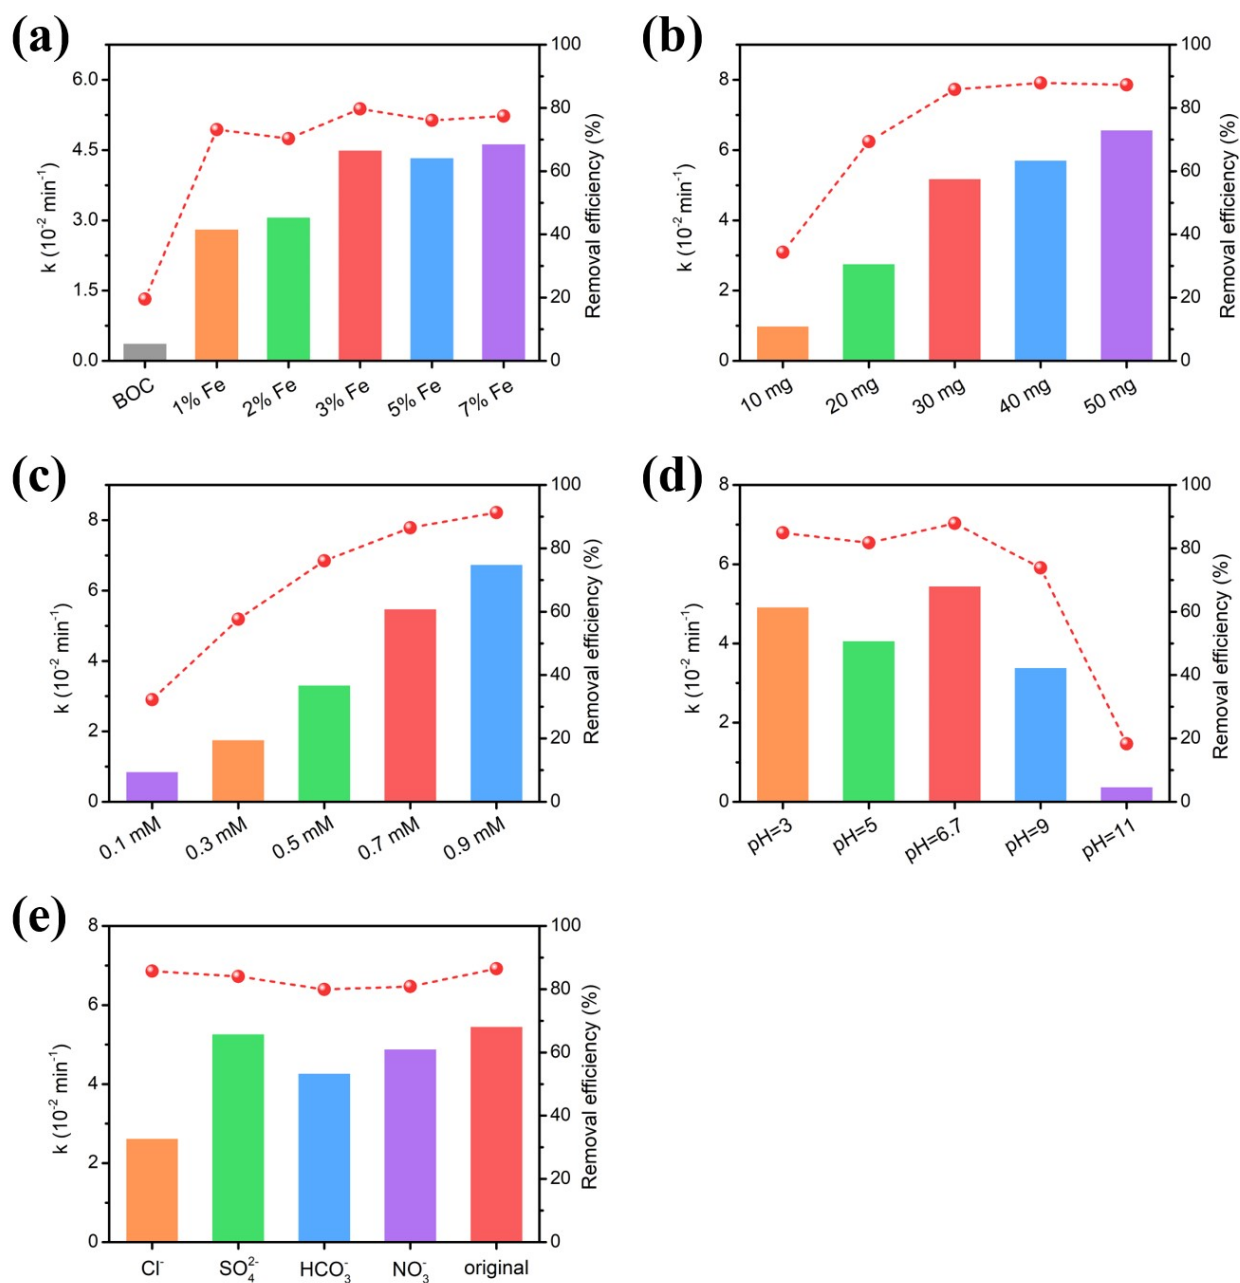

**Fig. S2.** Effects of (a) Fe doping amount, (b) catalyst dosage, (c) PMS concentrations, (d) initial pH values, (e) co-existing inorganic anions on the removal of CBZ.

**Table S1.** Degradation kinetic constants and removal rates for different samples.

| Figure | Experimental conditions                    | k (10 <sup>-2</sup> min <sup>-1</sup> ) | Removal rate (%) |      |
|--------|--------------------------------------------|-----------------------------------------|------------------|------|
| (a)    | 30 mg catalyst,<br>0.5 mM PMS,<br>pH=6.7   | BOC                                     | 0.37             | 19.6 |
|        |                                            | 1% Fe-BOC                               | 2.80             | 76.2 |
|        |                                            | 2% Fe-BOC                               | 3.06             | 70.9 |
|        |                                            | 3% Fe-BOC                               | 4.49             | 79.7 |
|        |                                            | 5% Fe-BOC                               | 4.33             | 76.1 |
|        |                                            | 7% Fe-BOC                               | 4.62             | 77.5 |
| (b)    | 3% Fe-BOC,<br>0.7 mM PMS,<br>pH=6.7        | 10 mg                                   | 0.96             | 34.4 |
|        |                                            | 20 mg                                   | 2.75             | 69.4 |
|        |                                            | 30 mg                                   | 5.17             | 85.9 |
|        |                                            | 40 mg                                   | 5.69             | 87.9 |
|        |                                            | 50 mg                                   | 6.56             | 87.3 |
| (c)    | 30 mg 3% Fe-<br>BOC, pH=6.7                | 0.1 mM                                  | 0.85             | 32.3 |
|        |                                            | 0.3 mM                                  | 1.74             | 57.7 |
|        |                                            | 0.5 mM                                  | 3.31             | 76.1 |
|        |                                            | 0.7 mM                                  | 5.47             | 86.5 |
|        |                                            | 0.9 mM                                  | 6.73             | 90.3 |
| (d)    | 30 mg 3% Fe-<br>BOC, 0.7 mM<br>PMS         | pH=3                                    | 4.91             | 84.9 |
|        |                                            | pH=5                                    | 4.06             | 81.8 |
|        |                                            | pH=6.7                                  | 5.44             | 87.9 |
|        |                                            | pH=9                                    | 3.38             | 73.8 |
|        |                                            | pH=11                                   | 0.36             | 18.3 |
| (e)    | 30 mg 3% Fe-<br>BOC, 0.7 mM<br>PMS, pH=6.7 | Cl <sup>-</sup>                         | 2.62             | 85.7 |
|        |                                            | SO <sub>4</sub> <sup>2-</sup>           | 5.25             | 84.1 |
|        |                                            | HCO <sub>3</sub> <sup>-</sup>           | 4.26             | 79.9 |
|        |                                            | NO <sub>3</sub> <sup>-</sup>            | 4.87             | 80.9 |
|        |                                            | original                                | 5.44             | 86.5 |

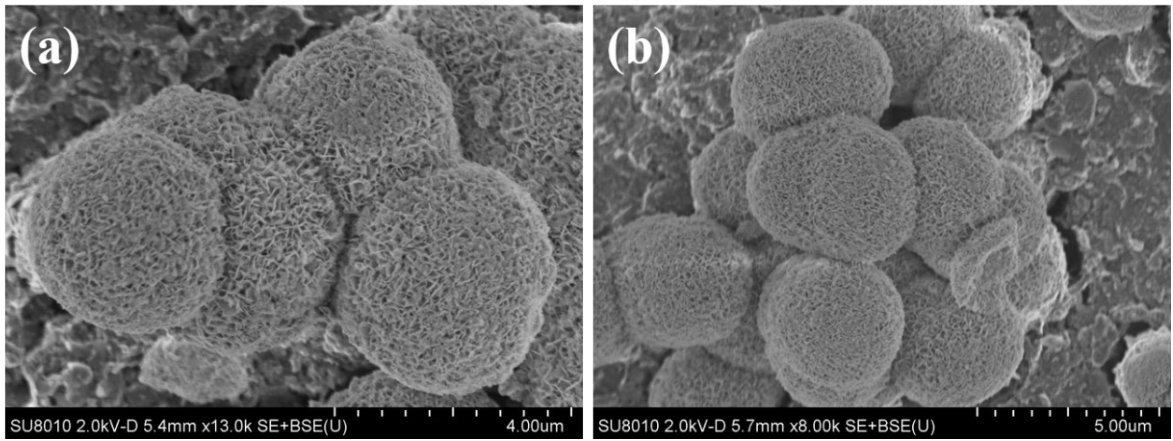

**Fig. S3.** SEM images of 3% Fe-BOC before (a) and after (b) the cycle experiment.



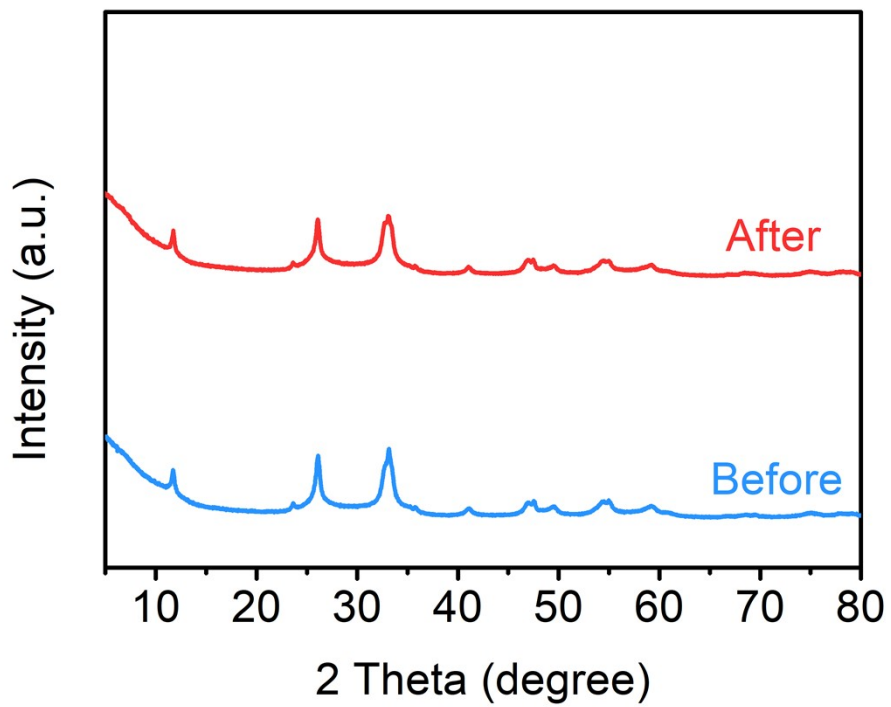

**Fig. S4.** XRD pattern before and after the cycle experiment.

**Table S2.** BET surface area, pore volume and average pore diameter of BOC and 3% Fe-BOC.

| <b>Sample</b> | <b>Surface Area<br/>(m<sup>2</sup>/g)</b> | <b>Average pore size<br/>(nm)</b> | <b>Pore volume<br/>(cm<sup>3</sup>·g<sup>-1</sup>)</b> |
|---------------|-------------------------------------------|-----------------------------------|--------------------------------------------------------|
| BOC           | 28.7                                      | 0.20                              | 24.7                                                   |
| 3% Fe-BOC     | 82.5                                      | 0.27                              | 11.4                                                   |

<sup>a</sup>. The surface area is measured with the Brunauer–Emmett–Teller (BET) method.

<sup>b</sup>. The pore volume is the single-point total pore volume at  $P/P_0 = 0.998$ .

<sup>c</sup>. The average pore size is calculated using the adsorption branch by Barrett–Joyner–Halenda (BJH) method.
